# Supplementary material for: Investigations of the band structures of edge-defect zigzag graphene nanoribbons using density functional theory
Source: Royal Society of Chemistry journal article supplement (doi:10.1039/c6ra03458f), 2016-01-01
Supplement: c6ra03458f1.pdf [file c6ra03458f1.pdf]

## Investigations of the band structures of edge-defect zigzag graphene nanoribbons using density functional theory

Hye Sook Moon,<sup>1</sup> Je Moon Yun<sup>2,\*</sup> Kwang Ho Kim,<sup>2,3</sup>

Seung Soon Jang<sup>4</sup> and Seung Geol Lee<sup>1,\*</sup>

<sup>1</sup> *Department of Organic Material Science and Engineering, Pusan National University, 2, Busandaehak-ro 63beon-gil, Geumjeong-gu, Busan, 46241, Republic of Korea*

<sup>2</sup> *Global Frontier R&D Center for Hybrid Interface Materials, 6F, Hyowon Industry-University Cooperation Bldg. Pusan National University, 2, Busandaehak-ro 63beon-gil, Geumjeong-gu, Busan, 46241, Republic of Korea*

<sup>3</sup> *School of Materials Science and Engineering, Pusan National University, 2, Busandaehak-ro 63beon-gil, Geumjeong-gu, Busan, 46241, Republic of Korea*

<sup>4</sup> *Computational NanoBio Technology Laboratory, School of Materials Science and Engineering, Georgia Institute of Technology, 771 Ferst Drive NW, Atlanta, GA 30332-0245, USA*

---

[yunjm@gfhim.re.kr](mailto:yunjm@gfhim.re.kr) (J. M. Yun)

Phone: +82-51-510-3796, Fax: +82-51-518-3660

[seunggeol.lee@pusan.ac.kr](mailto:seunggeol.lee@pusan.ac.kr) (S.G. Lee)

Phone: +82-51-510-2412, Fax: +82-51-512-8175

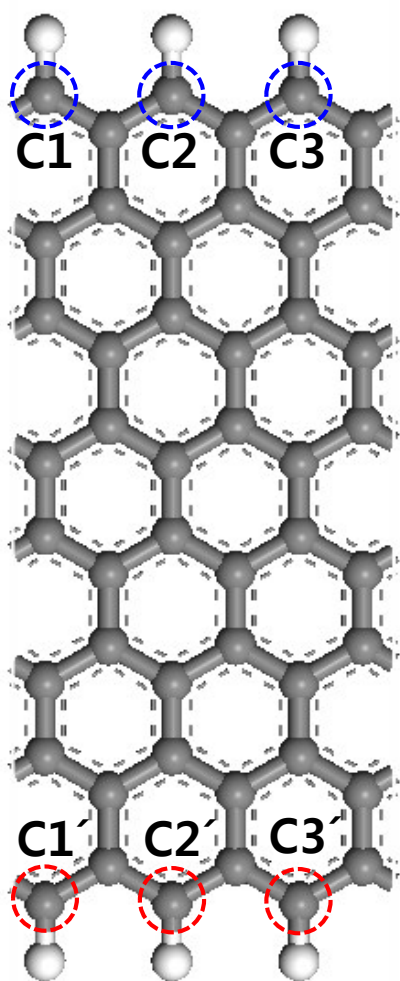

**Fig. S1.** Naming of edge carbon atoms for Tables S1 and S2.

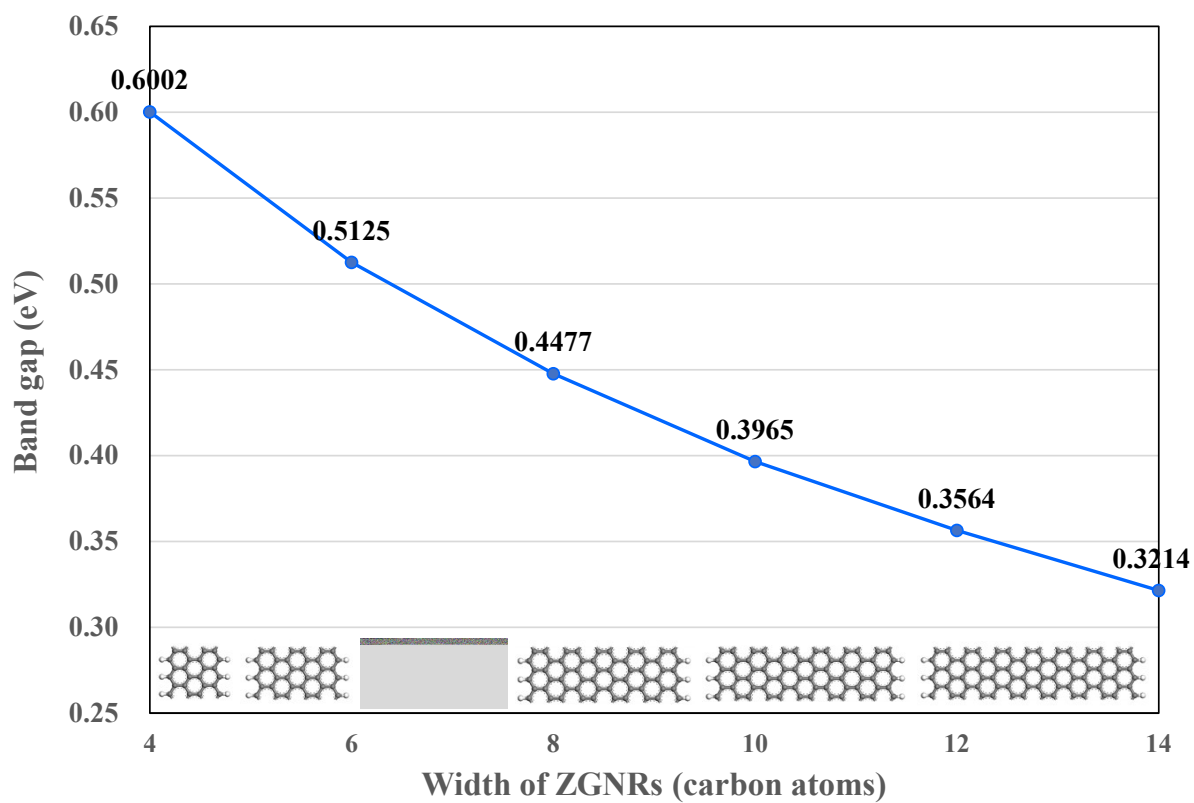

**Fig. S2.** Band gap magnitude as a function of ZGNR width. Wider ZGNRs were observed to yield narrower band gaps.
